# Supplementary material for: Revealing polygenic pleiotropy using genetic risk scores for asthma
Source: PubMed Central journal article supplement — HGG Adv. 2023 Aug 17;4(4):100233. doi: 10.1016/j.xhgg.2023.100233 (PMC10474095; doi:10.1016/j.xhgg.2023.100233), 2023-08-17
Supplement: mmc1.pdf [file mmc1.pdf]

**HGGA, Volume 4**

**Supplemental information**

**Revealing polygenic pleiotropy using genetic  
risk scores for asthma**

**Matthew Dapas, Yu Lin Lee, William Wentworth-Sheilds, Hae Kyung Im, Carole Ober, and Nathan Schoettler**

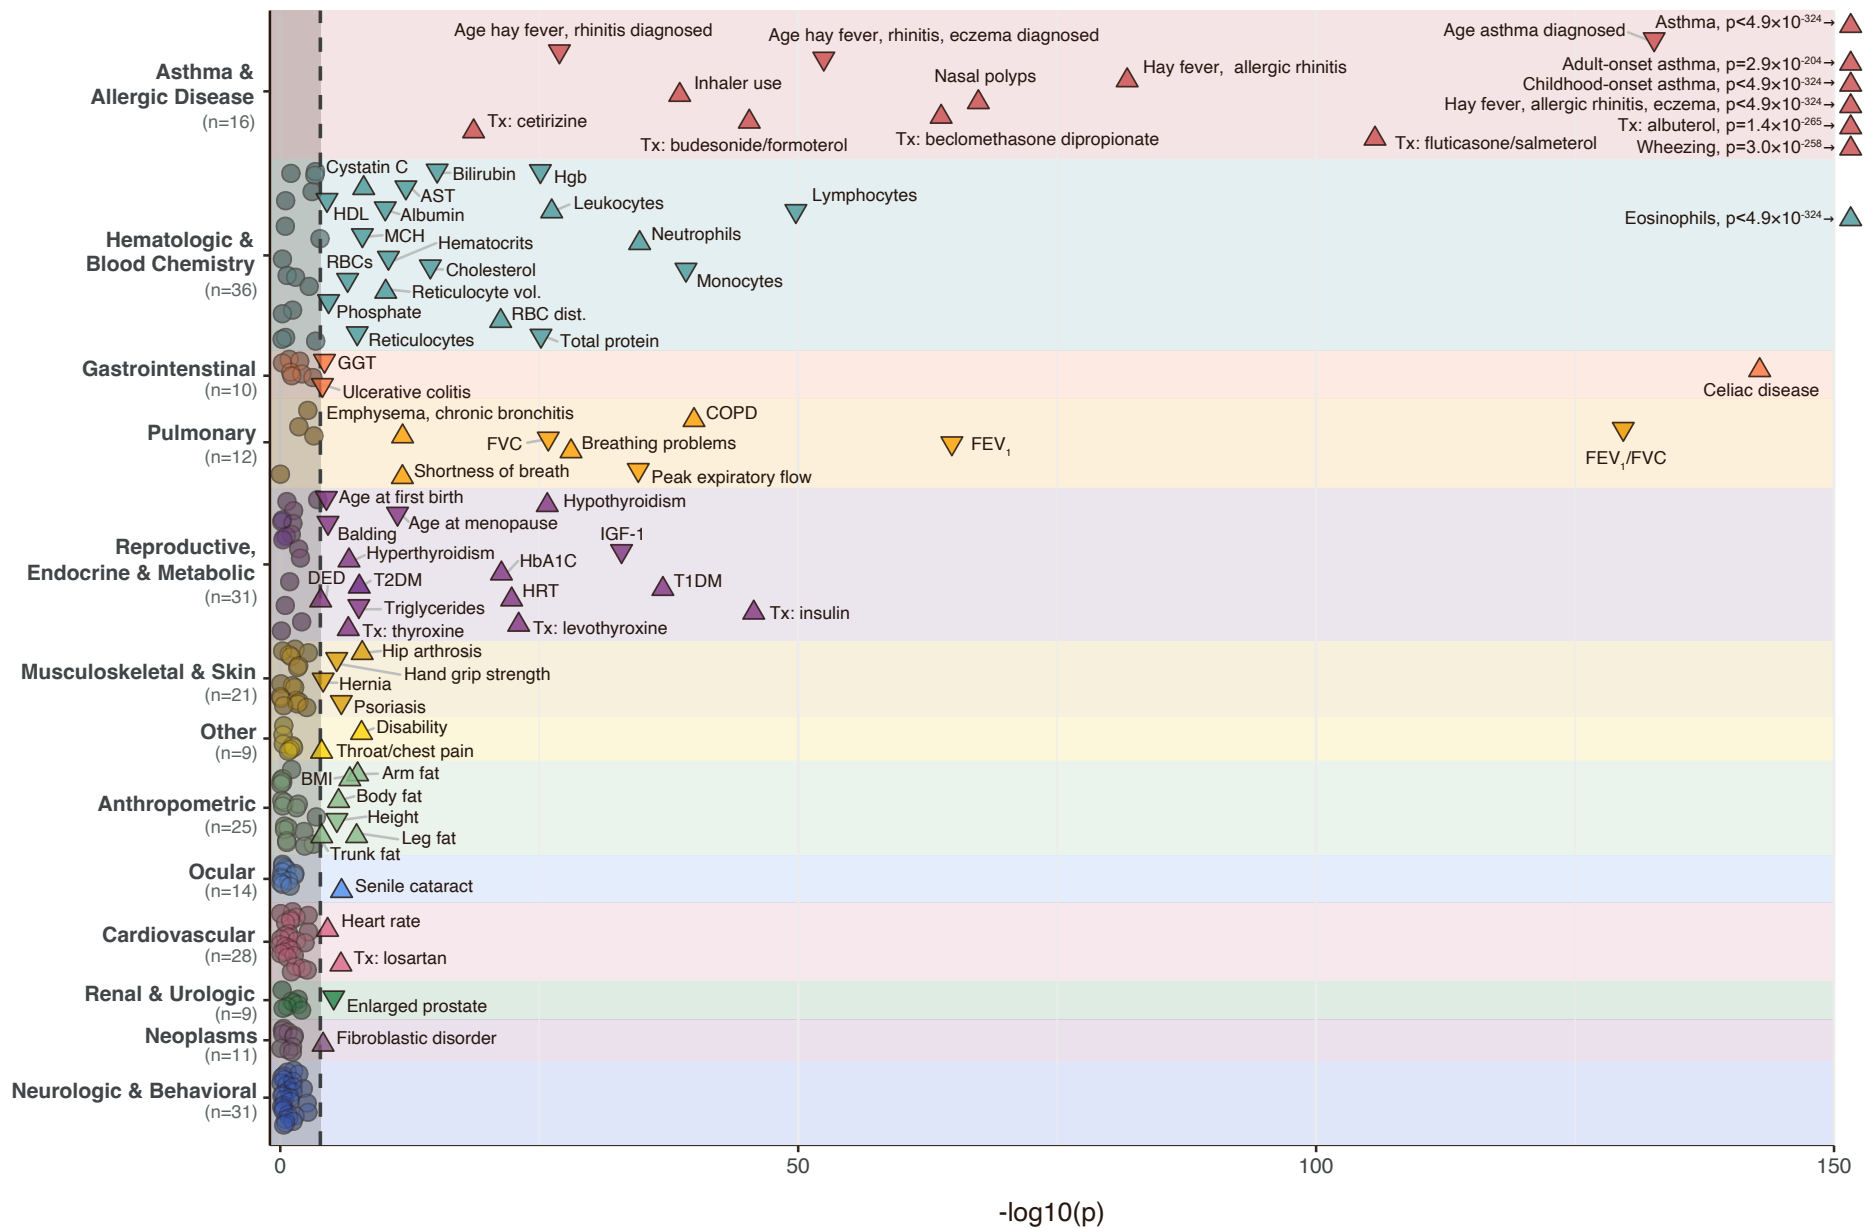

**Figure S1. Phenome-wide association test of TAGC asthma PRS in the UKB.** P-values for associations with the TAGC asthma PRS are shown for 257 non-redundant traits out of 371 heritable phenotypes tested in the UKB. Labeled traits to the right of the dashed line were significantly associated after correcting for multiple testing ( $p < 1.35 \times 10^{-4}$ ). Traits are grouped by corresponding biological system. The direction of each arrow corresponds to the direction of the association effect.
